# Supplementary material for: Parasitism perturbs the mucosal microbiome of Atlantic Salmon
Source: PubMed Central journal article supplement (PMC5339869; doi:10.1038/srep43465), 2017-03-07
Supplement: srep43465-s1.pdf [file srep43465-s1.pdf]

**Supplementary information for:**

**Parasitism perturbs the mucosal microbiome of Atlantic Salmon**

Authors: Llewellyn, M.S.\*<sup>1</sup>, Leadbeater, S.\*<sup>2</sup> Garcia, C.<sup>3</sup>, Sylvain F-E<sup>3</sup>, Custodio, M.<sup>4</sup>  
Ang, K. P.<sup>5</sup> Powell, F.<sup>5</sup> Carvalho, G. R.,<sup>6</sup> Creer, S.<sup>6</sup> Elliot, J.<sup>5</sup> Derome, N.<sup>3</sup>

Figure S1 – Histogram of louse densities per infected fish across all tanks

Figure S2 – Box plot of louse infection intensities in each test tank

Figure S3 – Chao rarefaction curves demonstrating saturation across all samples in the dataset. Rarefactions were undertaken in ten steps between 10 - 13,700 reads for each sample.

Table S1 – Variances associated with bubble plot in Figure 5.

Table S2 - Summary table of samples subjected to 16S rRNA amplicon metabarcoding in this study

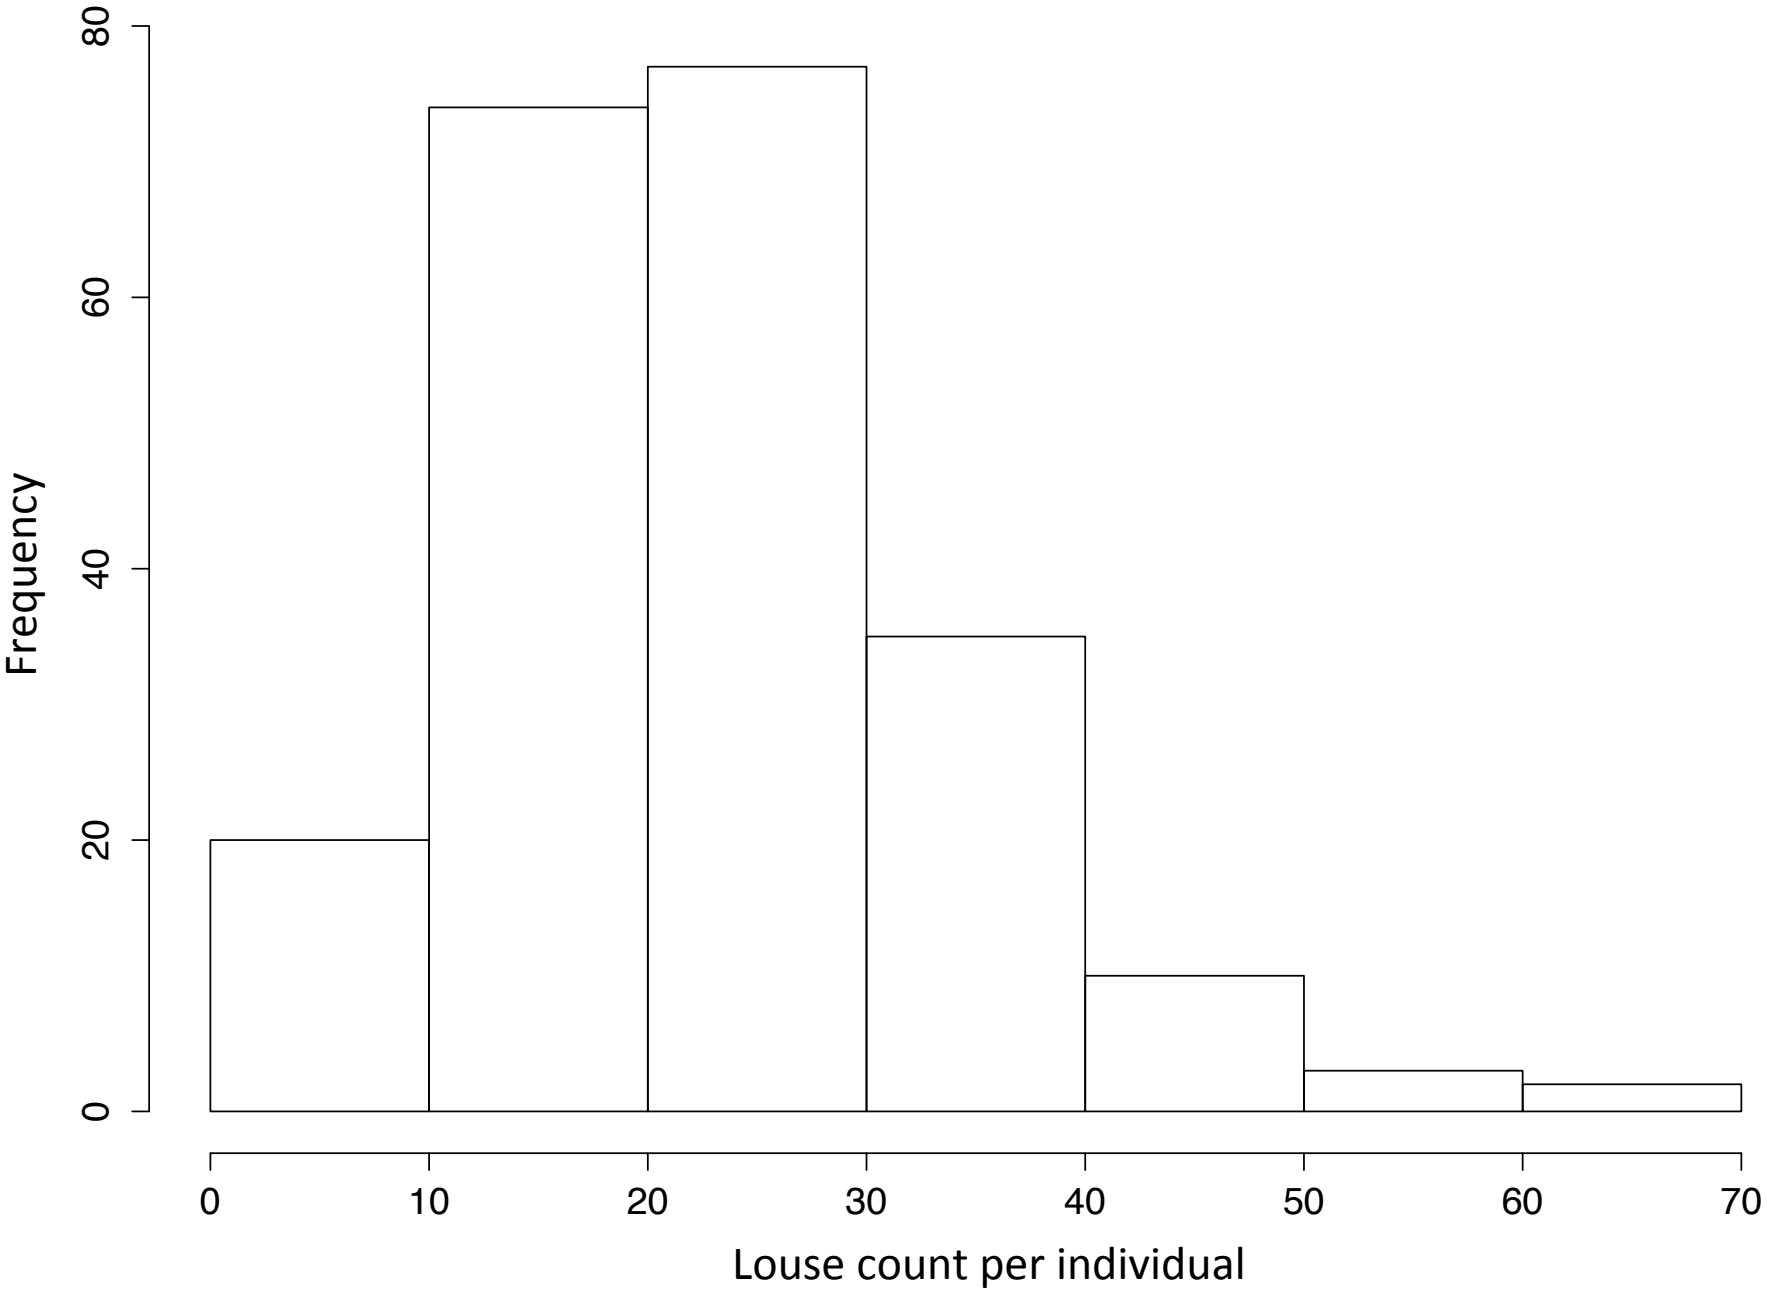

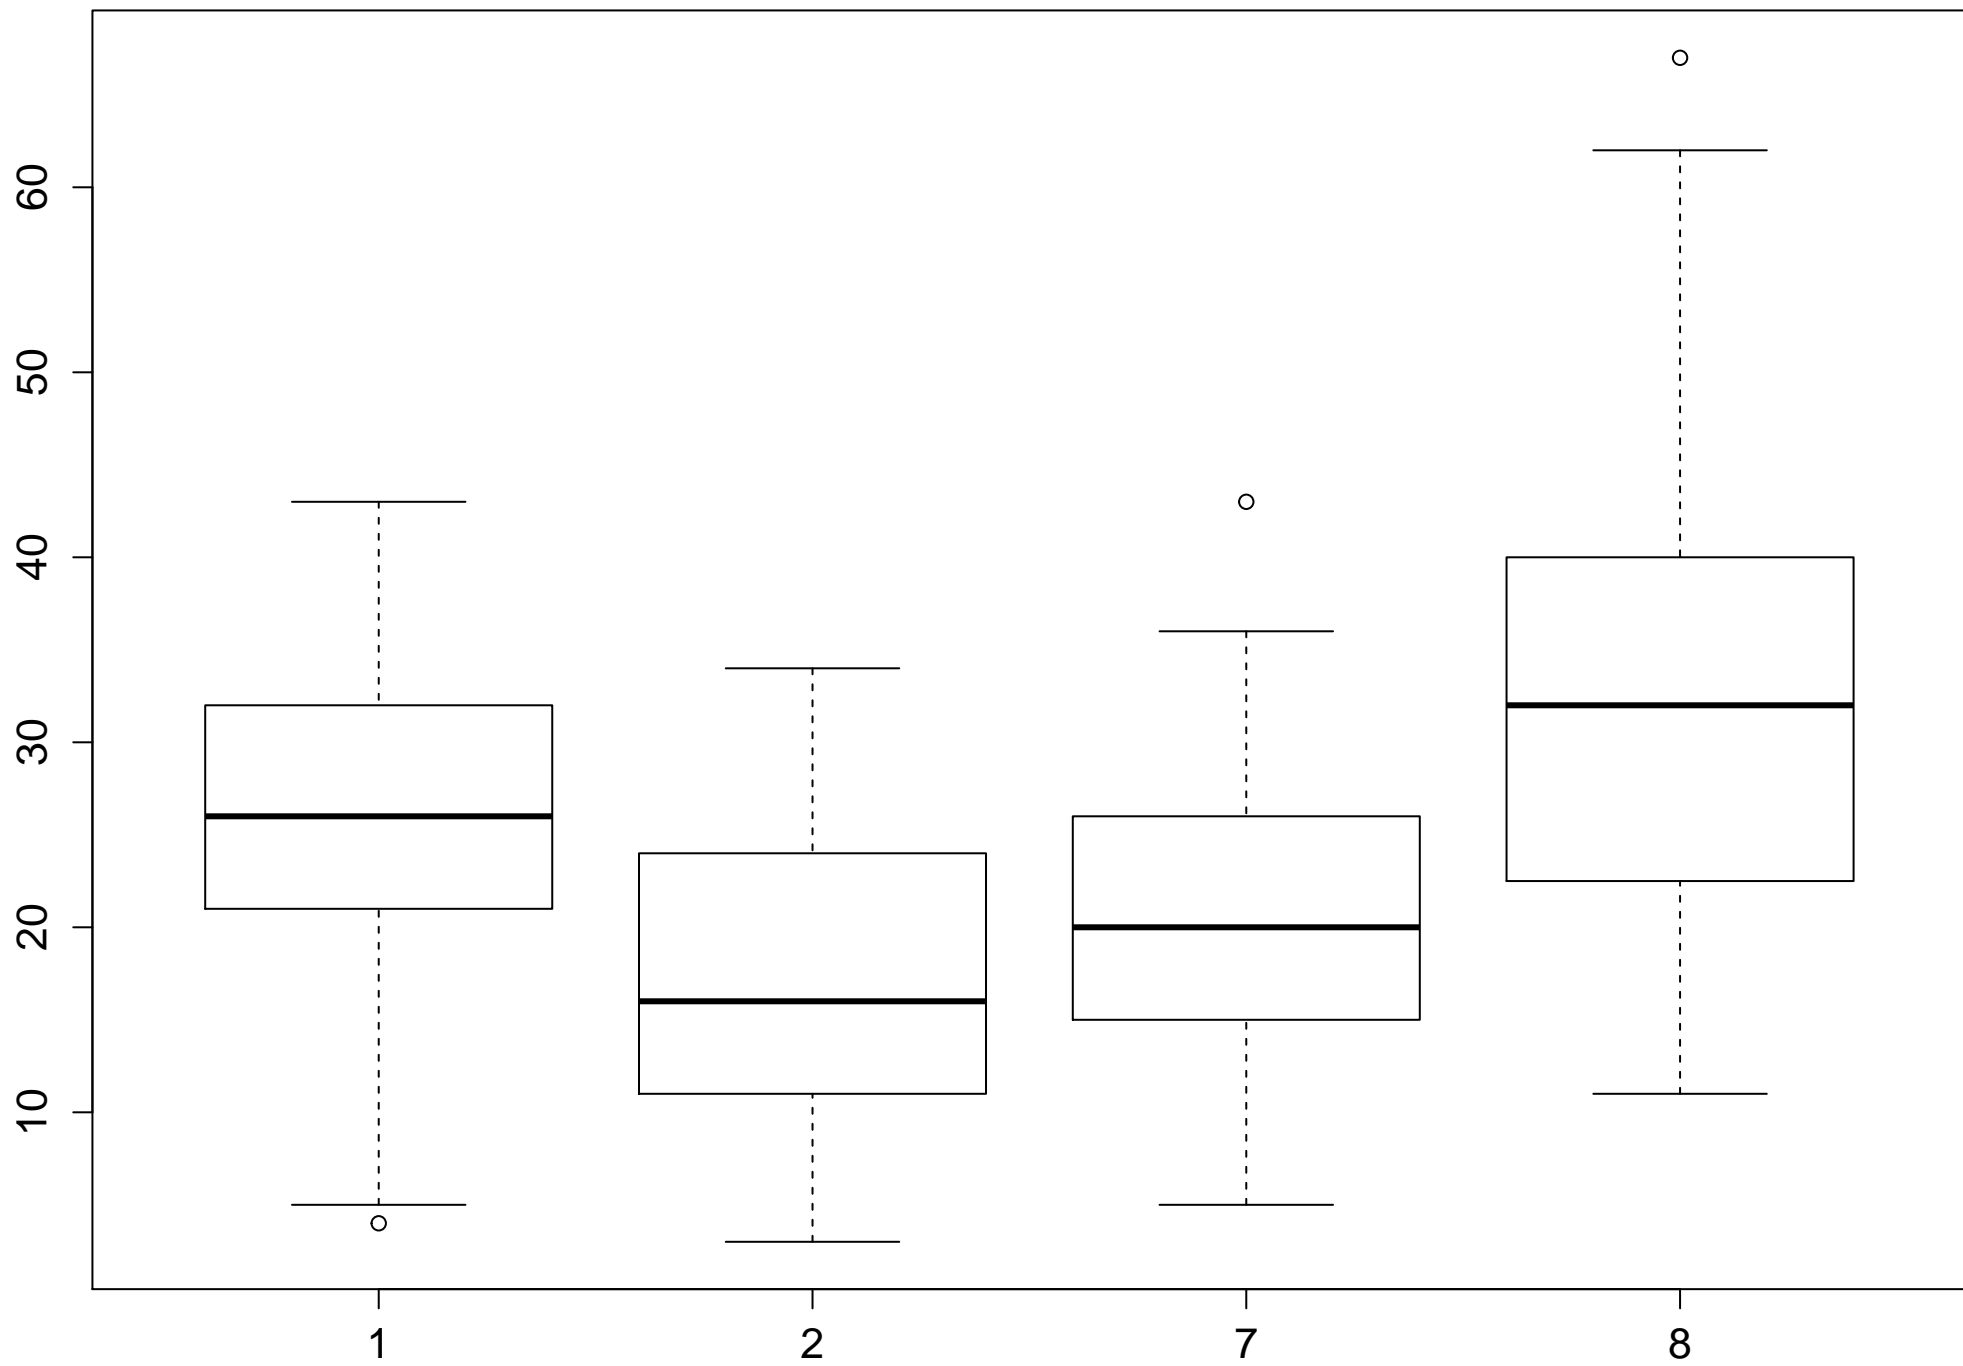

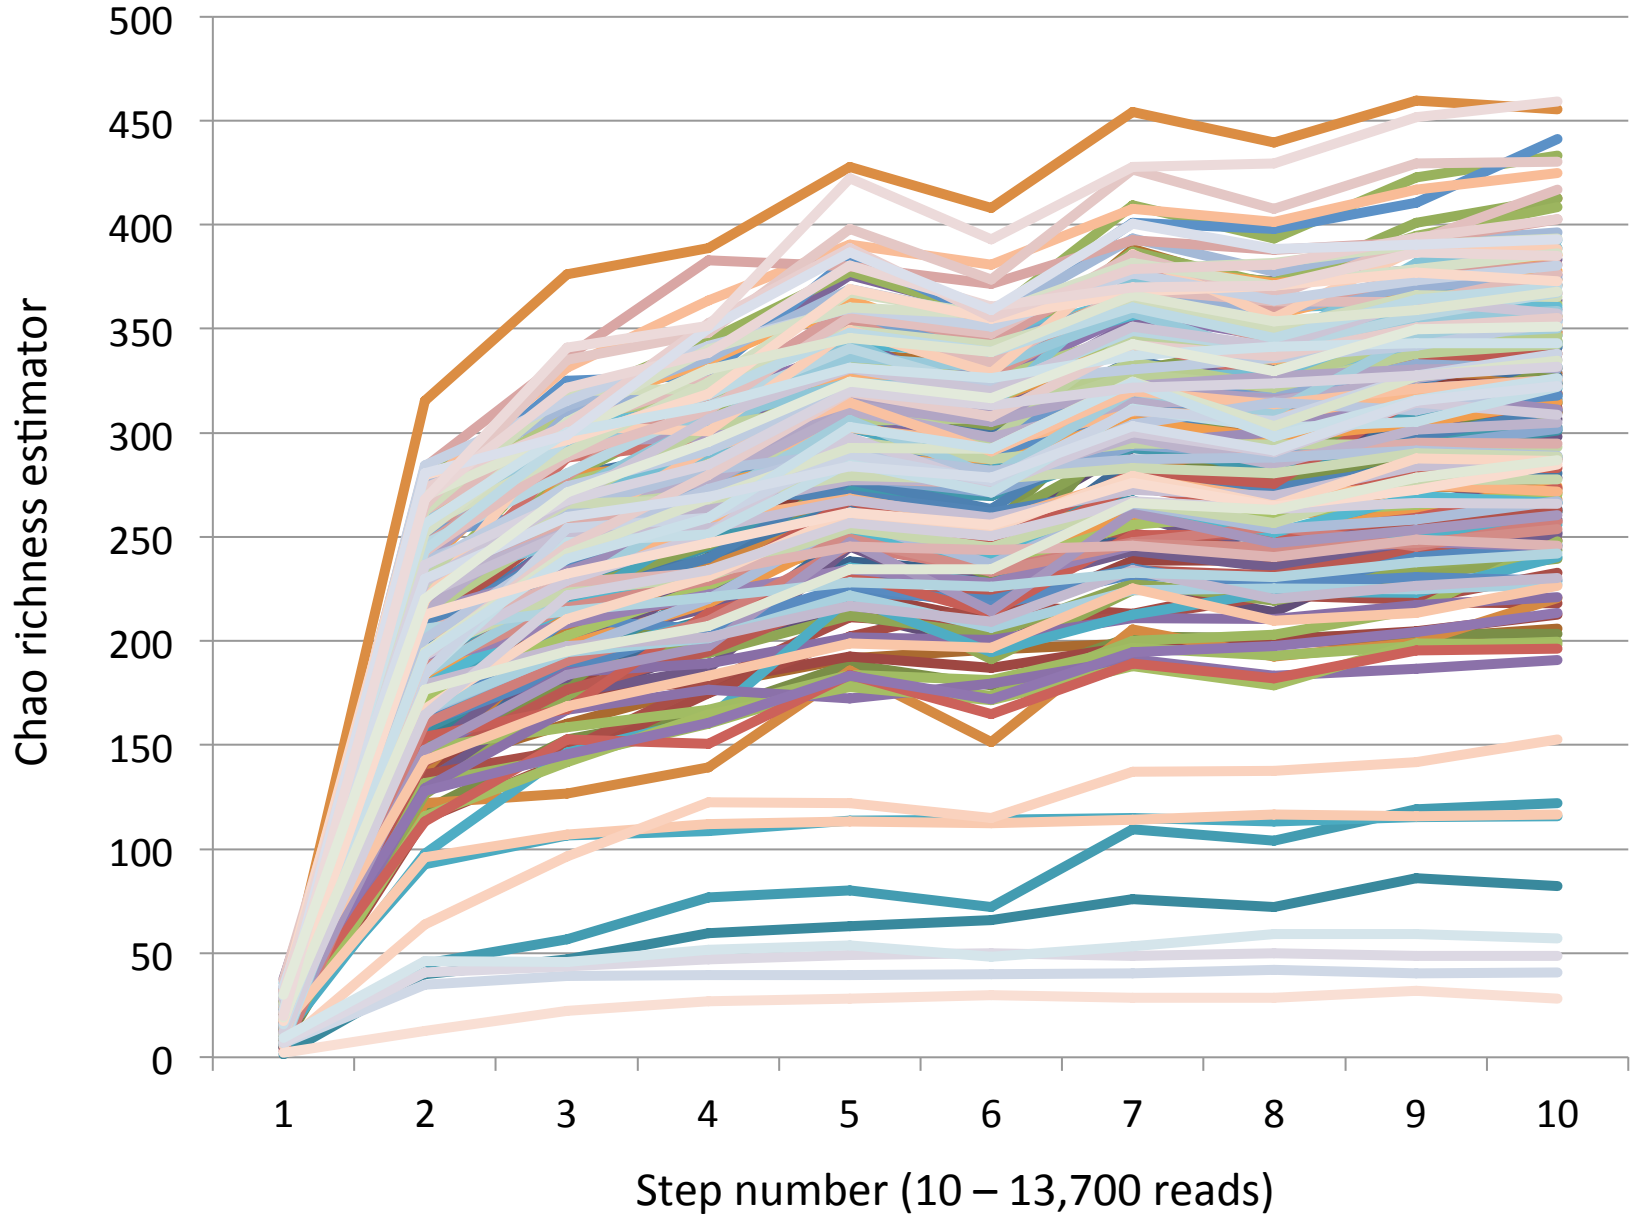

| class                | Sample type | Variance    |
|----------------------|-------------|-------------|
| g__Aeromonas         | Sea_louse   | 34.51599869 |
| g__Aquabacterium     | Sea_louse   | 368.9582901 |
| g__Arcobacter        | Sea_louse   | 20815.61131 |
| g__NS10_marine_group | Sea_louse   | 2533.227466 |
| g__Pseudomonas       | Sea_louse   | 99.40135955 |
| g__Tenacibaculum     | Sea_louse   | 98.40476122 |
| g__Vibrio            | Sea_louse   | 40907.75889 |
| o__Rhizobiales       | Sea_louse   | 14.04987569 |
| g__Alcanivorax       | T3_test     | 545.2926659 |
| g__Cupriavidus       | T3_test     | 219.8622354 |
| g__Flavobacterium    | T3_test     | 270.0045411 |
| g__Luteibacter       | T3_test     | 2.606247577 |
| g__Massilia          | T3_test     | 182.1680063 |
| g__NS10_marine_group | T3_test     | 211.4982472 |
| g__Perlucidibaca     | T3_test     | 8.912437412 |
| g__Pseudoalteromonas | T3_test     | 412.2079135 |
| g__Pseudomonas       | T3_test     | 968.1851343 |
| g__Sphingomonas      | T3_test     | 744.5893041 |
| g__Stenotrophomonas  | T3_test     | 30.89067074 |
| g__Tenacibaculum     | T3_test     | 6351.373468 |
| g__Variovorax        | T3_test     | 8.601000433 |
| g__Vibrio            | T3_test     | 112.310552  |
| f__Arthrobacter      | T3_control  | 7.043207026 |
| g__Cupriavidus       | T3_control  | 7.204142734 |
| g__Flavobacterium    | T3_control  | 464.5628838 |
| g__Lewinella         | T3_control  | 589.9735277 |
| g__Luteibacter       | T3_control  | 157.6822663 |
| g__Massilia          | T3_control  | 93.23944624 |
| g__Perlucidibaca     | T3_control  | 124.8790592 |
| g__Pseudomonas       | T3_control  | 4653.37866  |
| g__Sphingomonas      | T3_control  | 2849.118323 |
| g__Stenotrophomonas  | T3_control  | 174.55833   |
| g__Tenacibaculum     | T3_control  | 97057.24819 |
| g__Variovorax        | T3_control  | 472.5547288 |
| g__Vibrio            | T3_control  | 330.9381694 |
| f__Chitinophagaceae  | T2_test     | 418.5815531 |
| f__Flavobacteriaceae | T2_test     | 532.5915405 |
| g__Alcanivorax       | T2_test     | 238.8202084 |
| g__Arcobacter        | T2_test     | 80.08855592 |
| g__Leucothrix        | T2_test     | 616.8483395 |
| g__Lewinella         | T2_test     | 127.7663204 |
| g__Mesonia           | T2_test     | 527.1939327 |
| g__NS10_marine_group | T2_test     | 2811.722732 |
| g__Owenweeksia       | T2_test     | 357.0402792 |
| g__Pseudoalteromonas | T2_test     | 2112.079618 |

|                          |            |              |
|--------------------------|------------|--------------|
| g__Pseudomonas           | T2_test    | 4521.148359  |
| g__Rubritalea            | T2_test    | 620.7363788  |
| g__Shewanella            | T2_test    | 520.0398054  |
| g__Tenacibaculum         | T2_test    | 608.5749013  |
| g__Vibrio                | T2_test    | 37.22924062  |
| o__Oceanospirillales     | T2_test    | 574.8847852  |
| f__Pseudoalteromonadacea | T2_control | 474.7270017  |
| f__Saprospiraceae        | T2_control | 542.8618863  |
| g__Alcanivorax           | T2_control | 28.29972356  |
| g__Lewinella             | T2_control | 217.5473668  |
| g__Luteibacter           | T2_control | 485.0008757  |
| g__Oleispira             | T2_control | 273.8747098  |
| g__Pseudoalteromonas     | T2_control | -0.577991038 |
| g__Pseudomonas           | T2_control | 5425.246339  |
| g__Tenacibaculum         | T2_control | 85.81144484  |
| g__Vibrio                | T2_control | 115.0982056  |
| f__GR-WP33-58            | T1_test    | 177.9650984  |
| f__Rhodobacteraceae      | T1_test    | 477.0005997  |
| f__Saprospiraceae        | T1_test    | 180.0604548  |
| g__Aequorivita           | T1_test    | 374.9904662  |
| g__Alcanivorax           | T1_test    | 534.3968406  |
| g__Cobetia               | T1_test    | 616.8483395  |
| g__Crocinitomix          | T1_test    | 474.7270017  |
| g__Halomonas             | T1_test    | 368.9582901  |
| g__Leucothrix            | T1_test    | 609.1088462  |
| g__Lewinella             | T1_test    | 151.8352216  |
| g__Oleiphilus            | T1_test    | 339.5291165  |
| g__Oleispira             | T1_test    | 534.3968406  |
| g__Polaribacter          | T1_test    | 567.4135846  |
| g__Psychrobacter         | T1_test    | 46.56271423  |
| g__Rubritalea            | T1_test    | 593.7762012  |
| g__Tenacibaculum         | T1_test    | 79713.31391  |
| g__Vibrio                | T1_test    | 56.75018992  |
| f__GR-WP33-58            | T1_control | 201.6847502  |
| f__Rhodobacteraceae      | T1_control | 104.1508433  |
| f__Saprospiraceae        | T1_control | 48.04049866  |
| g__Alcanivorax           | T1_control | 556.2982472  |
| g__Cellulophaga          | T1_control | 545.2926659  |
| g__Cobetia               | T1_control | 495.3845058  |
| g__Crocinitomix          | T1_control | 371.9682806  |
| g__Glaciecola            | T1_control | 384.1301939  |
| g__Leucothrix            | T1_control | 405.8830544  |
| g__Lewinella             | T1_control | 11.2485533   |
| g__Moritella             | T1_control | 390.2843213  |
| g__Mycoplasmata          | T1_control | 616.8483395  |
| g__Polaribacter          | T1_control | 58.34345642  |

|                           |            |              |
|---------------------------|------------|--------------|
| g__Pseudoalteromonas      | T1_control | 491.9111007  |
| g__Salinisphaera          | T1_control | 300.3770541  |
| g__Tenacibaculum          | T1_control | 7643.420991  |
| g__Vibrio                 | T1_control | 53.24460859  |
| f__Chitinophagaceae       | T0_test    | 512.9344585  |
| f__Comamonadaceae         | T0_test    | 107.9667693  |
| f__GR-WP33-58             | T0_test    | 66.63499215  |
| f__Methylophilaceae       | T0_test    | 488.4498907  |
| f__Rhodobacteraceae       | T0_test    | 420.7169397  |
| f__Saprospiraceae         | T0_test    | 157.2890487  |
| g__Alcanivorax            | T0_test    | 208.4098438  |
| g__Arcobacter             | T0_test    | 106.3426135  |
| g__Aureispira             | T0_test    | 357.0402792  |
| g__Cellulophaga           | T0_test    | 556.2982472  |
| g__Cobetia                | T0_test    | 578.6386781  |
| g__Crocinitomix           | T0_test    | 266.1618114  |
| g__Leucothrix             | T0_test    | 180.0604548  |
| g__Lewinella              | T0_test    | 29.72558853  |
| g__Maribacter             | T0_test    | 226.8800119  |
| g__Marinobacter           | T0_test    | 305.8238644  |
| g__Methylophaga           | T0_test    | 67.10016249  |
| g__Nannocystaceae         | T0_test    | 190.7201635  |
| g__Owenweeksia            | T0_test    | 605.2573923  |
| g__Polaribacter           | T0_test    | 5895.171922  |
| g__Rhodobacter            | T0_test    | 538.0165872  |
| g__Robiginitomaculum      | T0_test    | 399.6069758  |
| g__Salinicola             | T0_test    | 238.8202084  |
| g__Sandaracinaceae        | T0_test    | 159.6556715  |
| g__Tenacibaculum          | T0_test    | 14397.70616  |
| g__Vibrio                 | T0_test    | 26.11174411  |
| o__Alteromonadales        | T0_test    | 399.6069758  |
| o__Sphingomonadales       | T0_test    | 567.4135846  |
| f__Chitinophagaceae       | T0_control | 616.8483395  |
| f__GR-WP33-58             | T0_control | -0.75650867  |
| f__Pseudoalteromonadaceae | T0_control | 368.9582901  |
| f__Rhodobacteraceae       | T0_control | -0.095296764 |
| f__Saprospiraceae         | T0_control | 143.5832572  |
| g__Alcanivorax            | T0_control | 5.119949009  |
| g__Cellulophaga           | T0_control | 171.7522     |
| g__Crocinitomix           | T0_control | 208.4098438  |
| g__Leucothrix             | T0_control | 5.769333018  |
| g__Lewinella              | T0_control | 300.0018153  |
| g__Marinicella            | T0_control | 516.4810343  |
| g__Nannocystaceae         | T0_control | 530.7892891  |
| g__Oleiphilus             | T0_control | 418.5815531  |
| g__Oleispira              | T0_control | 396.4872292  |

|                          |            |             |
|--------------------------|------------|-------------|
| g__Owenweeksia           | T0_control | 563.696277  |
| g__Polaribacter          | T0_control | 85.32708486 |
| g__Roseobacter           | T0_control | 512.9344585 |
| g__Tenacibaculum         | T0_control | 1072.975333 |
| g__Vibrio                | T0_control | 311.3194552 |
| o__Alteromonadales       | T0_control | 624.6366132 |
| c__Gammaproteobacteria   | Water      | 488.4498907 |
| f__Pseudoalteromonadacea | Water      | 387.20116   |
| f__Rhodobacteraceae      | Water      | 586.1830494 |
| f__Rhodobacteraceae      | Water      | 582.4047662 |
| g__Alcanivorax           | Water      | 4.739695629 |
| g__Colwellia             | Water      | 4814.570266 |
| g__Leucothrix            | Water      | 357.0402792 |
| g__Marinicella           | Water      | 409.0393864 |
| g__Marinomonas           | Water      | 488.4498907 |
| g__Oleiphilus            | Water      | 238.8202084 |
| g__Oleispira             | Water      | 26.11174411 |
| g__Owenweeksia           | Water      | 534.3968406 |
| g__Polaribacter          | Water      | 471.3267673 |
| g__Pseudoalteromonas     | Water      | 100.9723257 |
| g__Tenacibaculum         | Water      | 145.8358145 |
| g__Tenacibaculum         | Water      | 197.2623302 |
| g__Vibrio                | Water      | 36.72088172 |
| g__Vibrio                | Water      | 187.1935088 |
| g__Vibrio                | Water      | 624.6366132 |
| o__Alteromonadales       | Water      | 628.5490427 |



|               | Tank ID        | Time point<br>T <sub>0</sub> | T <sub>1</sub> | T <sub>2</sub> | T <sub>3</sub> |            |            |
|---------------|----------------|------------------------------|----------------|----------------|----------------|------------|------------|
| Salmon mucus  | Control        | Control Tank 1               | 10             | 11             | 10             | 12         |            |
|               |                | Control Tank 2               | 10             | 10             | 10             | 8          |            |
|               | Total control  |                              | 20             | 21             | 20             | 20         |            |
|               | Test           | Test Tank 1                  | 10             | 9              | 10             | 11         |            |
|               |                | Test Tank 2                  | 10             | 10             | 10             | 10         |            |
|               |                | Test Tank 4                  | 0              | 0              | 0              | 10         |            |
|               |                | Test Tank 3                  | 0              | 0              | 0              | 10         |            |
|               | Total test     |                              | 20             | 19             | 20             | 41         |            |
|               | L. salmonis    | Test                         | Test Tank 1    | 0              | 0              | 0          | 1 (pooled) |
|               |                |                              | Test Tank 2    | 0              | 0              | 0          | 1 (pooled) |
| Test Tank 4   |                |                              | 0              | 0              | 0              | 1 (pooled) |            |
| Test Tank 3   |                |                              | 0              | 0              | 0              | 1 (pooled) |            |
| Total lice    |                |                              |                |                | 4              |            |            |
| Water Biofilm | Shared Water   | 2                            | 2              | 2              | 2              |            |            |
|               | Control Tank 1 | 1                            | 1              | 1              | 1              |            |            |
|               | Control Tank 2 | 1                            | 1              | 1              | 1              |            |            |
|               | Test Tank 1    | 0                            | 1              | 1              | 0              |            |            |
|               | Test Tank 2    | 1                            | 1              | 1              | 0              |            |            |
|               | Test Tank 4    | 0                            | 0              | 0              | 0              |            |            |
|               | Test Tank 3    | 0                            | 0              | 0              | 1              |            |            |
| Grand total   |                |                              |                |                | 126            |            |            |
